# Supplementary material
Source: Elsevier journal article supplement (https://authors.library.caltech.edu/74413/7/mmc6.xlsx)
Supplement: mmc6 [file mmc6.xlsx]

## Sheet: Table S6
Table S6: Enriched GO Terms from List of Overlapping Genes
GO term	Description	P-value	FDR q-value	Enrichment (N, B, n, b)
GO:0044281	small molecule metabolic process	7.86e-31	1.01e-26	1.54 (17946,2605,2506,562)
GO:0044699	single-organism process	3.5e-30	2.25e-26	1.17 (17946,10681,2506,1747)
GO:0006082	organic acid metabolic process	4.33e-28	1.86e-24	1.93 (17946,967,2506,261)
GO:0043436	oxoacid metabolic process	7.99e-28	2.57e-24	1.94 (17946,950,2506,257)
GO:0019752	carboxylic acid metabolic process	8.89e-26	2.29e-22	1.96 (17946,839,2506,230)
GO:0044763	single-organism cellular process	1.27e-25	2.74e-22	1.19 (17946,8870,2506,1480)
GO:0048583	regulation of response to stimulus	4.16e-23	7.65e-20	1.44 (17946,2860,2506,574)
GO:0002682	regulation of immune system process	7.91e-23	1.27e-19	1.75 (17946,1140,2506,279)
GO:0002684	positive regulation of immune system process	4.85e-22	6.95e-19	1.97 (17946,710,2506,195)
GO:0051239	regulation of multicellular organismal process	5.65e-22	7.28e-19	1.51 (17946,2106,2506,445)
GO:0002376	immune system process	1.49e-21	1.74e-18	1.59 (17946,1652,2506,366)
GO:0044710	single-organism metabolic process	3.14e-21	3.37e-18	1.32 (17946,4314,2506,794)
GO:0048518	positive regulation of biological process	5.07e-21	5.03e-18	1.30 (17946,4629,2506,841)
GO:0048584	positive regulation of response to stimulus	1.12e-20	1.03e-17	1.59 (17946,1555,2506,346)
GO:0006629	lipid metabolic process	2.98e-20	2.56e-17	1.73 (17946,1058,2506,256)
GO:0055114	oxidation-reduction process	3.13e-20	2.52e-17	1.79 (17946,934,2506,233)
GO:0032787	monocarboxylic acid metabolic process	1.4e-17	1.06e-14	2.08 (17946,457,2506,133)
GO:0044255	cellular lipid metabolic process	2.29e-17	1.64e-14	1.78 (17946,814,2506,202)
GO:0048522	positive regulation of cellular process	4.16e-17	2.82e-14	1.29 (17946,4176,2506,751)
GO:0065007	biological regulation	6.9e-17	4.44e-14	1.13 (17946,10233,2506,1618)
GO:0050865	regulation of cell activation	5.07e-16	3.11e-13	2.09 (17946,407,2506,119)
GO:2000026	regulation of multicellular organismal development	1.29e-15	7.53e-13	1.55 (17946,1335,2506,289)
GO:0009605	response to external stimulus	1.61e-15	9e-13	1.55 (17946,1343,2506,290)
GO:0050776	regulation of immune response	2.05e-15	1.1e-12	1.77 (17946,728,2506,180)
GO:0006955	immune response	2.15e-15	1.11e-12	1.64 (17946,1014,2506,232)
GO:0050778	positive regulation of immune response	3.23e-15	1.6e-12	1.98 (17946,471,2506,130)
GO:0002694	regulation of leukocyte activation	3.57e-15	1.7e-12	2.10 (17946,378,2506,111)
GO:0065008	regulation of biological quality	3.85e-15	1.77e-12	1.37 (17946,2567,2506,490)
GO:0009966	regulation of signal transduction	1.12e-14	4.98e-12	1.40 (17946,2152,2506,421)
GO:0006631	fatty acid metabolic process	1.3e-14	5.58e-12	2.30 (17946,271,2506,87)
GO:0051249	regulation of lymphocyte activation	1.77e-14	7.35e-12	2.15 (17946,333,2506,100)
GO:0050793	regulation of developmental process	1.98e-14	7.96e-12	1.45 (17946,1768,2506,357)
GO:0050896	response to stimulus	3.2e-14	1.25e-11	1.18 (17946,6610,2506,1093)
GO:1901615	organic hydroxy compound metabolic process	3.8e-14	1.44e-11	1.94 (17946,470,2506,127)
GO:0051240	positive regulation of multicellular organismal process	7.95e-14	2.92e-11	1.56 (17946,1138,2506,248)
GO:0006952	defense response	1.41e-13	5.05e-11	1.54 (17946,1190,2506,256)
GO:0032502	developmental process	3.53e-13	1.23e-10	1.24 (17946,4379,2506,758)
GO:0001775	cell activation	4.69e-13	1.59e-10	1.80 (17946,569,2506,143)
GO:0002697	regulation of immune effector process	5.57e-13	1.84e-10	2.22 (17946,264,2506,82)
GO:0010646	regulation of cell communication	5.74e-13	1.85e-10	1.34 (17946,2450,2506,460)
GO:0023051	regulation of signaling	5.99e-13	1.88e-10	1.35 (17946,2438,2506,458)
GO:0070887	cellular response to chemical stimulus	1.41e-12	4.32e-10	1.39 (17946,1895,2506,369)
GO:0009987	cellular process	1.41e-12	4.24e-10	1.08 (17946,13170,2506,1980)
GO:0050863	regulation of T cell activation	1.99e-12	5.83e-10	2.23 (17946,251,2506,78)
GO:0050867	positive regulation of cell activation	2.3e-12	6.6e-10	2.20 (17946,261,2506,80)
GO:0007155	cell adhesion	2.71e-12	7.59e-10	1.63 (17946,812,2506,185)
GO:0022610	biological adhesion	3.82e-12	1.05e-09	1.63 (17946,815,2506,185)
GO:0002696	positive regulation of leukocyte activation	5.67e-12	1.52e-09	2.20 (17946,251,2506,77)
GO:0010033	response to organic substance	8.7e-12	2.29e-09	1.35 (17946,2182,2506,411)
GO:0010647	positive regulation of cell communication	9.83e-12	2.53e-09	1.48 (17946,1241,2506,257)
GO:1901564	organonitrogen compound metabolic process	1.03e-11	2.6e-09	1.40 (17946,1737,2506,339)
GO:0009967	positive regulation of signal transduction	1.06e-11	2.62e-09	1.51 (17946,1118,2506,236)
GO:0023056	positive regulation of signaling	1.07e-11	2.59e-09	1.48 (17946,1236,2506,256)
GO:1902531	regulation of intracellular signal transduction	1.27e-11	3.02e-09	1.48 (17946,1232,2506,255)
GO:0044711	single-organism biosynthetic process	1.27e-11	2.98e-09	1.52 (17946,1079,2506,229)
GO:0001817	regulation of cytokine production	1.59e-11	3.67e-09	1.82 (17946,477,2506,121)
GO:0032101	regulation of response to external stimulus	1.88e-11	4.24e-09	1.73 (17946,585,2506,141)
GO:0044767	single-organism developmental process	2.46e-11	5.45e-09	1.23 (17946,3982,2506,686)
GO:0070663	regulation of leukocyte proliferation	2.5e-11	5.46e-09	2.41 (17946,175,2506,59)
GO:0050789	regulation of biological process	2.99e-11	6.42e-09	1.11 (17946,9788,2506,1518)
GO:0007165	signal transduction	4.4e-11	9.29e-09	1.22 (17946,4361,2506,741)
GO:0044282	small molecule catabolic process	4.55e-11	9.45e-09	2.13 (17946,256,2506,76)
GO:0030198	extracellular matrix organization	5.82e-11	1.19e-08	1.93 (17946,356,2506,96)
GO:0051094	positive regulation of developmental process	6.24e-11	1.26e-08	1.56 (17946,898,2506,195)
GO:0043062	extracellular structure organization	6.88e-11	1.36e-08	1.93 (17946,357,2506,96)
GO:0032944	regulation of mononuclear cell proliferation	6.93e-11	1.35e-08	2.40 (17946,170,2506,57)
GO:0044707	single-multicellular organism process	7.72e-11	1.48e-08	1.27 (17946,3011,2506,535)
GO:0002253	activation of immune response	1e-10	1.89e-08	1.94 (17946,344,2506,93)
GO:0009653	anatomical structure morphogenesis	1.39e-10	2.6e-08	1.45 (17946,1242,2506,252)
GO:0016054	organic acid catabolic process	1.61e-10	2.96e-08	2.27 (17946,196,2506,62)
GO:0046395	carboxylic acid catabolic process	1.61e-10	2.92e-08	2.27 (17946,196,2506,62)
GO:0015850	organic hydroxy compound transport	1.68e-10	3e-08	2.84 (17946,101,2506,40)
GO:0050670	regulation of lymphocyte proliferation	1.7e-10	3e-08	2.37 (17946,169,2506,56)
GO:0044283	small molecule biosynthetic process	2.44e-10	4.24e-08	1.87 (17946,375,2506,98)
GO:0032879	regulation of localization	3.14e-10	5.39e-08	1.35 (17946,1891,2506,356)
GO:0051251	positive regulation of lymphocyte activation	3.23e-10	5.48e-08	2.13 (17946,232,2506,69)
GO:0042127	regulation of cell proliferation	3.32e-10	5.55e-08	1.43 (17946,1331,2506,265)
GO:0032501	multicellular organismal process	3.39e-10	5.59e-08	1.26 (17946,3071,2506,540)
GO:0044712	single-organism catabolic process	3.43e-10	5.59e-08	1.44 (17946,1265,2506,254)
GO:0048519	negative regulation of biological process	4.14e-10	6.66e-08	1.22 (17946,3920,2506,668)
GO:0065009	regulation of molecular function	4.28e-10	6.81e-08	1.30 (17946,2441,2506,442)
GO:0080134	regulation of response to stress	5.14e-10	8.08e-08	1.51 (17946,943,2506,199)
GO:0042981	regulation of apoptotic process	6.5e-10	1.01e-07	1.43 (17946,1273,2506,254)
GO:0008150	biological_process	6.6e-10	1.01e-07	1.04 (17946,15944,2506,2312)
GO:0044093	positive regulation of molecular function	7.1e-10	1.08e-07	1.38 (17946,1555,2506,300)
GO:0016477	cell migration	7.47e-10	1.12e-07	1.62 (17946,654,2506,148)
GO:0001819	positive regulation of cytokine production	9.54e-10	1.41e-07	1.91 (17946,327,2506,87)
GO:0006954	inflammatory response	1.04e-09	1.52e-07	1.84 (17946,374,2506,96)
GO:0043067	regulation of programmed cell death	1.31e-09	1.9e-07	1.42 (17946,1282,2506,254)
GO:0033559	unsaturated fatty acid metabolic process	1.4e-09	2.01e-07	2.79 (17946,95,2506,37)
GO:0031347	regulation of defense response	1.45e-09	2.05e-07	1.70 (17946,510,2506,121)
GO:0002703	regulation of leukocyte mediated immunity	1.45e-09	2.04e-07	2.57 (17946,120,2506,43)
GO:0006520	cellular amino acid metabolic process	1.8e-09	2.49e-07	1.79 (17946,404,2506,101)
GO:0006575	cellular modified amino acid metabolic process	1.93e-09	2.65e-07	2.19 (17946,193,2506,59)
GO:0071345	cellular response to cytokine stimulus	1.99e-09	2.7e-07	1.73 (17946,469,2506,113)
GO:0002252	immune effector process	2.03e-09	2.73e-07	1.80 (17946,389,2506,98)
GO:0044242	cellular lipid catabolic process	2.17e-09	2.88e-07	2.48 (17946,130,2506,45)
GO:0006790	sulfur compound metabolic process	2.36e-09	3.11e-07	1.91 (17946,307,2506,82)
GO:0006950	response to stress	2.39e-09	3.11e-07	1.27 (17946,2607,2506,463)
GO:0045595	regulation of cell differentiation	2.42e-09	3.12e-07	1.41 (17946,1290,2506,254)
GO:0072329	monocarboxylic acid catabolic process	2.79e-09	3.56e-07	2.92 (17946,81,2506,33)
GO:0019221	cytokine-mediated signaling pathway	2.86e-09	3.61e-07	1.86 (17946,339,2506,88)
GO:0010941	regulation of cell death	3.83e-09	4.79e-07	1.39 (17946,1345,2506,262)
GO:0045321	leukocyte activation	3.96e-09	4.9e-07	1.82 (17946,362,2506,92)
GO:0071310	cellular response to organic substance	4.11e-09	5.04e-07	1.36 (17946,1599,2506,303)
GO:0009062	fatty acid catabolic process	4.27e-09	5.19e-07	3.18 (17946,63,2506,28)
GO:0006805	xenobiotic metabolic process	4.45e-09	5.35e-07	2.31 (17946,155,2506,50)
GO:0050794	regulation of cellular process	4.67e-09	5.58e-07	1.10 (17946,9400,2506,1446)
GO:0006928	cellular component movement	5.05e-09	5.97e-07	1.41 (17946,1245,2506,245)
GO:0006066	alcohol metabolic process	5.44e-09	6.38e-07	1.84 (17946,338,2506,87)
GO:0010817	regulation of hormone levels	5.52e-09	6.41e-07	2.06 (17946,222,2506,64)
GO:0051270	regulation of cellular component movement	5.7e-09	6.56e-07	1.62 (17946,588,2506,133)
GO:0045597	positive regulation of cell differentiation	6.62e-09	7.55e-07	1.57 (17946,680,2506,149)
GO:0034097	response to cytokine	6.68e-09	7.55e-07	1.63 (17946,567,2506,129)
GO:0051241	negative regulation of multicellular organismal process	6.8e-09	7.62e-07	1.50 (17946,854,2506,179)
GO:0040011	locomotion	6.96e-09	7.73e-07	1.51 (17946,825,2506,174)
GO:0051716	cellular response to stimulus	7.08e-09	7.8e-07	1.16 (17946,5347,2506,869)
GO:1901700	response to oxygen-containing compound	8.07e-09	8.81e-07	1.42 (17946,1142,2506,227)
GO:0050870	positive regulation of T cell activation	8.55e-09	9.26e-07	2.18 (17946,181,2506,55)
GO:0009893	positive regulation of metabolic process	9.31e-09	9.99e-07	1.24 (17946,3012,2506,521)
GO:0030168	platelet activation	1.08e-08	1.15e-06	2.09 (17946,206,2506,60)
GO:1903034	regulation of response to wounding	1.19e-08	1.26e-06	1.82 (17946,338,2506,86)
GO:0035556	intracellular signal transduction	1.25e-08	1.31e-06	1.36 (17946,1448,2506,276)
GO:0042493	response to drug	1.55e-08	1.61e-06	1.81 (17946,345,2506,87)
GO:0046903	secretion	1.76e-08	1.81e-06	1.65 (17946,503,2506,116)
GO:1902533	positive regulation of intracellular signal transduction	1.77e-08	1.81e-06	1.53 (17946,736,2506,157)
GO:0015711	organic anion transport	1.79e-08	1.81e-06	1.83 (17946,325,2506,83)
GO:0042221	response to chemical	2.21e-08	2.22e-06	1.23 (17946,3096,2506,531)
GO:0043648	dicarboxylic acid metabolic process	2.31e-08	2.31e-06	2.72 (17946,87,2506,33)
GO:0008284	positive regulation of cell proliferation	2.44e-08	2.41e-06	1.52 (17946,751,2506,159)
GO:0046649	lymphocyte activation	2.5e-08	2.46e-06	1.86 (17946,296,2506,77)
GO:0042592	homeostatic process	2.95e-08	2.88e-06	1.43 (17946,1050,2506,209)
GO:0043065	positive regulation of apoptotic process	3.01e-08	2.92e-06	1.62 (17946,530,2506,120)
GO:0002819	regulation of adaptive immune response	3.03e-08	2.92e-06	2.50 (17946,109,2506,38)
GO:0022603	regulation of anatomical structure morphogenesis	3.19e-08	3.05e-06	1.52 (17946,719,2506,153)
GO:0051128	regulation of cellular component organization	3.2e-08	3.03e-06	1.33 (17946,1656,2506,307)
GO:0043603	cellular amide metabolic process	3.23e-08	3.03e-06	2.15 (17946,173,2506,52)
GO:0048856	anatomical structure development	3.26e-08	3.04e-06	1.25 (17946,2599,2506,454)
GO:0006690	icosanoid metabolic process	3.33e-08	3.09e-06	2.73 (17946,84,2506,32)
GO:0001676	long-chain fatty acid metabolic process	3.33e-08	3.07e-06	2.73 (17946,84,2506,32)
GO:1901568	fatty acid derivative metabolic process	3.33e-08	3.04e-06	2.73 (17946,84,2506,32)
GO:0032940	secretion by cell	3.78e-08	3.43e-06	1.72 (17946,405,2506,97)
GO:0030334	regulation of cell migration	3.85e-08	3.47e-06	1.62 (17946,521,2506,118)
GO:0050790	regulation of catalytic activity	3.95e-08	3.53e-06	1.29 (17946,2034,2506,366)
GO:0016042	lipid catabolic process	4.23e-08	3.76e-06	1.98 (17946,228,2506,63)
GO:0048513	organ development	4.46e-08	3.93e-06	1.41 (17946,1116,2506,219)
GO:0060333	interferon-gamma-mediated signaling pathway	4.66e-08	4.09e-06	2.97 (17946,65,2506,27)
GO:1902105	regulation of leukocyte differentiation	4.93e-08	4.29e-06	2.02 (17946,209,2506,59)
GO:0043085	positive regulation of catalytic activity	4.96e-08	4.29e-06	1.37 (17946,1326,2506,253)
GO:0043068	positive regulation of programmed cell death	5.23e-08	4.49e-06	1.61 (17946,535,2506,120)
GO:0033993	response to lipid	6.07e-08	5.18e-06	1.54 (17946,662,2506,142)
GO:0070665	positive regulation of leukocyte proliferation	6.2e-08	5.26e-06	2.41 (17946,116,2506,39)
GO:0050851	antigen receptor-mediated signaling pathway	6.2e-08	5.22e-06	2.41 (17946,116,2506,39)
GO:0042110	T cell activation	6.67e-08	5.58e-06	2.06 (17946,191,2506,55)
GO:0071357	cellular response to type I interferon	6.85e-08	5.69e-06	2.93 (17946,66,2506,27)
GO:0060337	type I interferon signaling pathway	6.85e-08	5.65e-06	2.93 (17946,66,2506,27)
GO:0040012	regulation of locomotion	7.58e-08	6.22e-06	1.56 (17946,601,2506,131)
GO:0002685	regulation of leukocyte migration	7.72e-08	6.29e-06	2.45 (17946,108,2506,37)
GO:0060341	regulation of cellular localization	7.79e-08	6.31e-06	1.44 (17946,930,2506,187)
GO:0032946	positive regulation of mononuclear cell proliferation	9.06e-08	7.29e-06	2.41 (17946,113,2506,38)
GO:0002699	positive regulation of immune effector process	9.07e-08	7.26e-06	2.30 (17946,131,2506,42)
GO:0010942	positive regulation of cell death	9.94e-08	7.91e-06	1.58 (17946,558,2506,123)
GO:0034340	response to type I interferon	9.95e-08	7.86e-06	2.89 (17946,67,2506,27)
GO:0050900	leukocyte migration	1.02e-07	8.05e-06	1.96 (17946,223,2506,61)
GO:0048870	cell motility	1.11e-07	8.7e-06	1.50 (17946,715,2506,150)
GO:2000145	regulation of cell motility	1.15e-07	8.9e-06	1.58 (17946,548,2506,121)
GO:0009887	organ morphogenesis	1.23e-07	9.51e-06	1.69 (17946,398,2506,94)
GO:0009991	response to extracellular stimulus	1.35e-07	1.04e-05	1.80 (17946,302,2506,76)
GO:0051049	regulation of transport	1.45e-07	1.11e-05	1.34 (17946,1417,2506,265)
GO:0048523	negative regulation of cellular process	1.5e-07	1.14e-05	1.19 (17946,3592,2506,599)
GO:0002683	negative regulation of immune system process	1.59e-07	1.19e-05	1.77 (17946,319,2506,79)
GO:0071346	cellular response to interferon-gamma	1.62e-07	1.21e-05	2.57 (17946,89,2506,32)
GO:0001894	tissue homeostasis	1.73e-07	1.29e-05	2.33 (17946,120,2506,39)
GO:0031667	response to nutrient levels	1.88e-07	1.39e-05	1.83 (17946,278,2506,71)
GO:0048585	negative regulation of response to stimulus	1.96e-07	1.44e-05	1.38 (17946,1112,2506,215)
GO:0022617	extracellular matrix disassembly	1.96e-07	1.44e-05	2.35 (17946,116,2506,38)
GO:0051604	protein maturation	2.07e-07	1.51e-05	1.95 (17946,217,2506,59)
GO:0008610	lipid biosynthetic process	2.11e-07	1.53e-05	1.62 (17946,469,2506,106)
GO:0003071	renal system process involved in regulation of systemic arterial blood pressure	2.21e-07	1.59e-05	4.65 (17946,20,2506,13)
GO:0050671	positive regulation of lymphocyte proliferation	2.23e-07	1.59e-05	2.37 (17946,112,2506,37)
GO:0042129	regulation of T cell proliferation	2.45e-07	1.74e-05	2.27 (17946,126,2506,40)
GO:0006820	anion transport	2.5e-07	1.77e-05	1.64 (17946,437,2506,100)
GO:0031349	positive regulation of defense response	2.71e-07	1.91e-05	1.83 (17946,270,2506,69)
GO:0006869	lipid transport	2.95e-07	2.07e-05	1.99 (17946,194,2506,54)
GO:0002822	regulation of adaptive immune response based on somatic recombination of immune receptors built from immunoglobulin superfamily domains	3.15e-07	2.2e-05	2.43 (17946,100,2506,34)
GO:0008202	steroid metabolic process	3.28e-07	2.27e-05	1.89 (17946,235,2506,62)
GO:0045619	regulation of lymphocyte differentiation	3.57e-07	2.46e-05	2.27 (17946,123,2506,39)
GO:0051186	cofactor metabolic process	3.57e-07	2.45e-05	1.85 (17946,251,2506,65)
GO:0032103	positive regulation of response to external stimulus	4.22e-07	2.88e-05	1.96 (17946,201,2506,55)
GO:0031325	positive regulation of cellular metabolic process	4.4e-07	2.99e-05	1.22 (17946,2799,2506,476)
GO:0016485	protein processing	5.04e-07	3.4e-05	1.96 (17946,197,2506,54)
GO:0050727	regulation of inflammatory response	6.18e-07	4.14e-05	1.86 (17946,239,2506,62)
GO:0002757	immune response-activating signal transduction	6.3e-07	4.21e-05	1.76 (17946,297,2506,73)
GO:0050878	regulation of body fluid levels	6.34e-07	4.21e-05	1.52 (17946,594,2506,126)
GO:0014070	response to organic cyclic compound	7.08e-07	4.67e-05	1.48 (17946,683,2506,141)
GO:0032844	regulation of homeostatic process	7.13e-07	4.68e-05	1.73 (17946,314,2506,76)
GO:0051046	regulation of secretion	7.49e-07	4.9e-05	1.53 (17946,561,2506,120)
GO:0016053	organic acid biosynthetic process	7.61e-07	4.95e-05	1.82 (17946,256,2506,65)
GO:0046394	carboxylic acid biosynthetic process	7.61e-07	4.93e-05	1.82 (17946,256,2506,65)
GO:0002706	regulation of lymphocyte mediated immunity	8.8e-07	5.67e-05	2.41 (17946,95,2506,32)
GO:0034341	response to interferon-gamma	1e-06	6.42e-05	2.30 (17946,109,2506,35)
GO:0006935	chemotaxis	1.02e-06	6.51e-05	1.80 (17946,258,2506,65)
GO:0042330	taxis	1.02e-06	6.48e-05	1.80 (17946,258,2506,65)
GO:0009615	response to virus	1.06e-06	6.69e-05	1.81 (17946,253,2506,64)
GO:0022600	digestive system process	1.15e-06	7.26e-05	3.01 (17946,50,2506,21)
GO:0007599	hemostasis	1.16e-06	7.24e-05	1.57 (17946,485,2506,106)
GO:0006732	coenzyme metabolic process	1.21e-06	7.54e-05	1.94 (17946,192,2506,52)
GO:0050817	coagulation	1.24e-06	7.71e-05	1.57 (17946,480,2506,105)
GO:0007596	blood coagulation	1.24e-06	7.67e-05	1.57 (17946,480,2506,105)
GO:0006518	peptide metabolic process	1.27e-06	7.82e-05	2.28 (17946,110,2506,35)
GO:0048869	cellular developmental process	1.34e-06	8.2e-05	1.23 (17946,2298,2506,396)
GO:0050795	regulation of behavior	1.43e-06	8.7e-05	2.02 (17946,163,2506,46)
GO:0051050	positive regulation of transport	1.51e-06	9.13e-05	1.46 (17946,686,2506,140)
GO:0007584	response to nutrient	1.63e-06	9.82e-05	2.07 (17946,149,2506,43)
GO:0051174	regulation of phosphorus metabolic process	1.65e-06	9.9e-05	1.27 (17946,1809,2506,320)
GO:0050920	regulation of chemotaxis	1.89e-06	0.000113	2.19 (17946,121,2506,37)
GO:1902578	single-organism localization	2.09e-06	0.000124	1.20 (17946,2829,2506,475)
GO:0048566	embryonic digestive tract development	2.11e-06	0.000125	4.63 (17946,17,2506,11)
GO:0032760	positive regulation of tumor necrosis factor production	2.25e-06	0.000132	3.09 (17946,44,2506,19)
GO:0002429	immune response-activating cell surface receptor signaling pathway	2.46e-06	0.000144	1.94 (17946,181,2506,49)
GO:0050853	B cell receptor signaling pathway	2.79e-06	0.000162	3.58 (17946,30,2506,15)
GO:0045087	innate immune response	2.88e-06	0.000167	1.45 (17946,676,2506,137)
GO:0019883	antigen processing and presentation of endogenous antigen	2.94e-06	0.00017	5.37 (17946,12,2506,9)
GO:2000107	negative regulation of leukocyte apoptotic process	3.1e-06	0.000178	3.14 (17946,41,2506,18)
GO:0019220	regulation of phosphate metabolic process	3.14e-06	0.00018	1.26 (17946,1796,2506,316)
GO:0044765	single-organism transport	3.21e-06	0.000183	1.21 (17946,2667,2506,449)
GO:0002705	positive regulation of leukocyte mediated immunity	3.41e-06	0.000194	2.48 (17946,78,2506,27)
GO:1903530	regulation of secretion by cell	3.99e-06	0.000226	1.52 (17946,515,2506,109)
GO:0050715	positive regulation of cytokine secretion	4.1e-06	0.000231	2.56 (17946,70,2506,25)
GO:0042445	hormone metabolic process	4.21e-06	0.000236	2.00 (17946,154,2506,43)
GO:0006793	phosphorus metabolic process	4.55e-06	0.000254	1.22 (17946,2240,2506,383)
GO:0045580	regulation of T cell differentiation	4.56e-06	0.000253	2.29 (17946,97,2506,31)
GO:0050892	intestinal absorption	4.75e-06	0.000262	4.38 (17946,18,2506,11)
GO:1901566	organonitrogen compound biosynthetic process	4.79e-06	0.000264	1.49 (17946,552,2506,115)
GO:0071496	cellular response to external stimulus	4.81e-06	0.000263	1.90 (17946,185,2506,49)
GO:0046113	nucleobase catabolic process	4.95e-06	0.00027	5.73 (17946,10,2506,8)
GO:1903557	positive regulation of tumor necrosis factor superfamily cytokine production	5.01e-06	0.000272	2.96 (17946,46,2506,19)
GO:0009968	negative regulation of signal transduction	5.04e-06	0.000273	1.38 (17946,889,2506,171)
GO:0051223	regulation of protein transport	5.07e-06	0.000273	1.60 (17946,380,2506,85)
GO:0048565	digestive tract development	5.09e-06	0.000273	2.78 (17946,54,2506,21)
GO:1901605	alpha-amino acid metabolic process	5.1e-06	0.000272	1.84 (17946,206,2506,53)
GO:0006766	vitamin metabolic process	5.21e-06	0.000277	2.13 (17946,121,2506,36)
GO:0030154	cell differentiation	5.53e-06	0.000293	1.27 (17946,1627,2506,288)
GO:0010604	positive regulation of macromolecule metabolic process	5.59e-06	0.000295	1.22 (17946,2271,2506,387)
GO:0048872	homeostasis of number of cells	5.97e-06	0.000314	2.33 (17946,89,2506,29)
GO:0003014	renal system process	5.99e-06	0.000314	2.57 (17946,67,2506,24)
GO:0010562	positive regulation of phosphorus metabolic process	6.37e-06	0.000332	1.30 (17946,1317,2506,239)
GO:0045937	positive regulation of phosphate metabolic process	6.37e-06	0.000331	1.30 (17946,1317,2506,239)
GO:0048878	chemical homeostasis	6.38e-06	0.00033	1.42 (17946,710,2506,141)
GO:1903036	positive regulation of response to wounding	6.65e-06	0.000343	2.09 (17946,127,2506,37)
GO:0050707	regulation of cytokine secretion	6.77e-06	0.000348	2.19 (17946,108,2506,33)
GO:0006956	complement activation	7.07e-06	0.000361	3.00 (17946,43,2506,18)
GO:0030299	intestinal cholesterol absorption	7.22e-06	0.000368	6.27 (17946,8,2506,7)
GO:0006208	pyrimidine nucleobase catabolic process	7.22e-06	0.000366	6.27 (17946,8,2506,7)
GO:0042102	positive regulation of T cell proliferation	7.68e-06	0.000388	2.39 (17946,81,2506,27)
GO:0043207	response to external biotic stimulus	8.04e-06	0.000404	1.44 (17946,641,2506,129)
GO:0034440	lipid oxidation	8.74e-06	0.000438	2.57 (17946,64,2506,23)
GO:0072376	protein activation cascade	8.74e-06	0.000437	2.57 (17946,64,2506,23)
GO:0060284	regulation of cell development	9.44e-06	0.00047	1.43 (17946,655,2506,131)
GO:0045621	positive regulation of lymphocyte differentiation	9.66e-06	0.000478	2.45 (17946,73,2506,25)
GO:0009612	response to mechanical stimulus	9.76e-06	0.000482	1.89 (17946,174,2506,46)
GO:0002576	platelet degranulation	9.94e-06	0.000489	2.36 (17946,82,2506,27)
GO:0034103	regulation of tissue remodeling	9.95e-06	0.000487	2.69 (17946,56,2506,21)
GO:0006099	tricarboxylic acid cycle	1.01e-05	0.000494	3.46 (17946,29,2506,14)
GO:0051707	response to other organism	1.02e-05	0.000495	1.52 (17946,467,2506,99)
GO:0002688	regulation of leukocyte chemotaxis	1.07e-05	0.000518	2.49 (17946,69,2506,24)
GO:0002764	immune response-regulating signaling pathway	1.16e-05	0.000562	1.56 (17946,405,2506,88)
GO:0006796	phosphate-containing compound metabolic process	1.26e-05	0.000608	1.22 (17946,2198,2506,373)
GO:1902107	positive regulation of leukocyte differentiation	1.34e-05	0.000643	2.10 (17946,116,2506,34)
GO:2000106	regulation of leukocyte apoptotic process	1.41e-05	0.000675	2.46 (17946,70,2506,24)
GO:0035295	tube development	1.43e-05	0.000679	1.91 (17946,161,2506,43)
GO:1990267	response to transition metal nanoparticle	1.43e-05	0.000679	2.18 (17946,102,2506,31)
GO:0019369	arachidonic acid metabolic process	1.45e-05	0.000682	2.70 (17946,53,2506,20)
GO:0044092	negative regulation of molecular function	1.45e-05	0.000681	1.35 (17946,911,2506,172)
GO:0034308	primary alcohol metabolic process	1.48e-05	0.000692	2.97 (17946,41,2506,17)
GO:0015908	fatty acid transport	1.5e-05	0.000698	2.78 (17946,49,2506,19)
GO:0007159	leukocyte cell-cell adhesion	1.51e-05	0.000702	2.86 (17946,45,2506,18)
GO:1902001	fatty acid transmembrane transport	1.59e-05	0.000737	5.21 (17946,11,2506,8)
GO:0007638	mechanosensory behavior	1.59e-05	0.000734	5.21 (17946,11,2506,8)
GO:0009081	branched-chain amino acid metabolic process	1.61e-05	0.000743	3.74 (17946,23,2506,12)
GO:0050708	regulation of protein secretion	1.69e-05	0.000773	1.90 (17946,162,2506,43)
GO:0006811	ion transport	1.72e-05	0.000787	1.30 (17946,1164,2506,212)
GO:0015718	monocarboxylic acid transport	1.78e-05	0.00081	2.16 (17946,103,2506,31)
GO:0046942	carboxylic acid transport	1.81e-05	0.00082	1.76 (17946,220,2506,54)
GO:0044243	multicellular organismal catabolic process	1.87e-05	0.000847	2.33 (17946,80,2506,26)
GO:0006695	cholesterol biosynthetic process	1.92e-05	0.000865	3.16 (17946,34,2506,15)
GO:0006720	isoprenoid metabolic process	1.94e-05	0.000872	2.09 (17946,113,2506,33)
GO:0044236	multicellular organismal metabolic process	1.95e-05	0.000874	2.21 (17946,94,2506,29)
GO:0051272	positive regulation of cellular component movement	2.06e-05	0.000919	1.63 (17946,303,2506,69)
GO:0015909	long-chain fatty acid transport	2.08e-05	0.000926	3.02 (17946,38,2506,16)
GO:0050848	regulation of calcium-mediated signaling	2.08e-05	0.000923	3.02 (17946,38,2506,16)
GO:0032680	regulation of tumor necrosis factor production	2.14e-05	0.000942	2.36 (17946,76,2506,25)
GO:0006635	fatty acid beta-oxidation	2.16e-05	0.000949	2.80 (17946,46,2506,18)
GO:0001910	regulation of leukocyte mediated cytotoxicity	2.16e-05	0.000945	2.80 (17946,46,2506,18)
GO:0032956	regulation of actin cytoskeleton organization	2.26e-05	0.000985	1.74 (17946,227,2506,55)
GO:0019395	fatty acid oxidation	2.3e-05	0.001	2.50 (17946,63,2506,22)
GO:0015849	organic acid transport	2.37e-05	0.00103	1.74 (17946,222,2506,54)
GO:0006721	terpenoid metabolic process	2.44e-05	0.00106	2.19 (17946,95,2506,29)
GO:0050777	negative regulation of immune response	2.59e-05	0.00111	2.15 (17946,100,2506,30)
GO:0009725	response to hormone	2.65e-05	0.00114	1.38 (17946,760,2506,146)
GO:0070201	regulation of establishment of protein localization	2.78e-05	0.00119	1.50 (17946,443,2506,93)
GO:0050864	regulation of B cell activation	2.85e-05	0.00122	2.20 (17946,91,2506,28)
GO:0043306	positive regulation of mast cell degranulation	2.85e-05	0.00121	5.57 (17946,9,2506,7)
GO:0006853	carnitine shuttle	2.85e-05	0.00121	5.57 (17946,9,2506,7)
GO:0001911	negative regulation of leukocyte mediated cytotoxicity	2.85e-05	0.00121	5.57 (17946,9,2506,7)
GO:0033008	positive regulation of mast cell activation involved in immune response	2.85e-05	0.0012	5.57 (17946,9,2506,7)
GO:0031342	negative regulation of cell killing	2.85e-05	0.0012	5.57 (17946,9,2506,7)
GO:0009607	response to biotic stimulus	2.93e-05	0.00123	1.40 (17946,670,2506,131)
GO:0043122	regulation of I-kappaB kinase/NF-kappaB signaling	2.99e-05	0.00125	1.75 (17946,213,2506,52)
GO:0002718	regulation of cytokine production involved in immune response	3.04e-05	0.00126	2.74 (17946,47,2506,18)
GO:0050730	regulation of peptidyl-tyrosine phosphorylation	3.24e-05	0.00134	1.80 (17946,187,2506,47)
GO:0051960	regulation of nervous system development	3.26e-05	0.00135	1.44 (17946,563,2506,113)
GO:1901701	cellular response to oxygen-containing compound	3.27e-05	0.00134	1.39 (17946,708,2506,137)
GO:0060326	cell chemotaxis	3.43e-05	0.00141	1.90 (17946,151,2506,40)
GO:0048873	homeostasis of number of cells within a tissue	3.51e-05	0.00143	3.75 (17946,21,2506,11)
GO:1903555	regulation of tumor necrosis factor superfamily cytokine production	3.51e-05	0.00143	2.30 (17946,78,2506,25)
GO:0032965	regulation of collagen biosynthetic process	3.56e-05	0.00145	3.32 (17946,28,2506,13)
GO:0002521	leukocyte differentiation	3.63e-05	0.00147	1.68 (17946,247,2506,58)
GO:0006919	activation of cysteine-type endopeptidase activity involved in apoptotic process	3.85e-05	0.00156	2.24 (17946,83,2506,26)
GO:0031341	regulation of cell killing	3.99e-05	0.0016	2.62 (17946,52,2506,19)
GO:0051336	regulation of hydrolase activity	4.01e-05	0.00161	1.29 (17946,1173,2506,211)
GO:0018108	peptidyl-tyrosine phosphorylation	4.12e-05	0.00165	1.90 (17946,147,2506,39)
GO:0007009	plasma membrane organization	4.27e-05	0.0017	2.00 (17946,122,2506,34)
GO:0051051	negative regulation of transport	4.37e-05	0.00174	1.55 (17946,361,2506,78)
GO:0042325	regulation of phosphorylation	4.39e-05	0.00174	1.29 (17946,1162,2506,209)
GO:0001977	renal system process involved in regulation of blood volume	4.48e-05	0.00177	4.30 (17946,15,2506,9)
GO:0090025	regulation of monocyte chemotaxis	4.48e-05	0.00177	4.30 (17946,15,2506,9)
GO:1901617	organic hydroxy compound biosynthetic process	4.49e-05	0.00176	1.85 (17946,163,2506,42)
GO:0046645	positive regulation of gamma-delta T cell activation	4.55e-05	0.00178	6.14 (17946,7,2506,6)
GO:0045765	regulation of angiogenesis	4.69e-05	0.00183	1.80 (17946,179,2506,45)
GO:0002707	negative regulation of lymphocyte mediated immunity	4.73e-05	0.00184	3.44 (17946,25,2506,12)
GO:1901342	regulation of vasculature development	4.76e-05	0.00185	1.76 (17946,195,2506,48)
GO:0072593	reactive oxygen species metabolic process	4.85e-05	0.00188	2.22 (17946,84,2506,26)
GO:0032970	regulation of actin filament-based process	4.92e-05	0.0019	1.67 (17946,244,2506,57)
GO:0050871	positive regulation of B cell activation	4.94e-05	0.0019	2.51 (17946,57,2506,20)
GO:0030155	regulation of cell adhesion	5.13e-05	0.00197	1.57 (17946,334,2506,73)
GO:0044259	multicellular organismal macromolecule metabolic process	5.18e-05	0.00198	2.17 (17946,89,2506,27)
GO:0006104	succinyl-CoA metabolic process	5.29e-05	0.00202	7.16 (17946,5,2506,5)
GO:0023057	negative regulation of signaling	5.57e-05	0.00212	1.31 (17946,983,2506,180)
GO:1901661	quinone metabolic process	5.63e-05	0.00213	3.21 (17946,29,2506,13)
GO:0018212	peptidyl-tyrosine modification	5.7e-05	0.00215	1.87 (17946,149,2506,39)
GO:0009719	response to endogenous stimulus	6.1e-05	0.0023	1.27 (17946,1232,2506,219)
GO:0010712	regulation of collagen metabolic process	6.18e-05	0.00232	3.04 (17946,33,2506,14)
GO:0002704	negative regulation of leukocyte mediated immunity	6.18e-05	0.00231	3.04 (17946,33,2506,14)
GO:0044246	regulation of multicellular organismal metabolic process	6.38e-05	0.00238	2.79 (17946,41,2506,16)
GO:0050801	ion homeostasis	6.46e-05	0.0024	1.45 (17946,494,2506,100)
GO:0030217	T cell differentiation	6.73e-05	0.0025	2.11 (17946,95,2506,28)
GO:0006810	transport	6.77e-05	0.00251	1.15 (17946,3341,2506,537)
GO:0048731	system development	6.84e-05	0.00253	1.38 (17946,682,2506,131)
GO:0010648	negative regulation of cell communication	7e-05	0.00258	1.31 (17946,987,2506,180)
GO:0051247	positive regulation of protein metabolic process	7.34e-05	0.00269	1.28 (17946,1159,2506,207)
GO:0009083	branched-chain amino acid catabolic process	7.64e-05	0.0028	3.77 (17946,19,2506,10)
GO:0045058	T cell selection	7.67e-05	0.0028	3.31 (17946,26,2506,12)
GO:0030335	positive regulation of cell migration	7.82e-05	0.00285	1.60 (17946,287,2506,64)
GO:0051130	positive regulation of cellular component organization	7.83e-05	0.00284	1.36 (17946,727,2506,138)
GO:0071396	cellular response to lipid	8.12e-05	0.00294	1.57 (17946,310,2506,68)
GO:0040017	positive regulation of locomotion	8.12e-05	0.00293	1.57 (17946,310,2506,68)
GO:0043410	positive regulation of MAPK cascade	8.25e-05	0.00297	1.51 (17946,385,2506,81)
GO:0002483	antigen processing and presentation of endogenous peptide antigen	8.36e-05	0.003	5.01 (17946,10,2506,7)
GO:0046643	regulation of gamma-delta T cell activation	8.36e-05	0.00299	5.01 (17946,10,2506,7)
GO:0030029	actin filament-based process	8.43e-05	0.00301	1.58 (17946,299,2506,66)
GO:0046165	alcohol biosynthetic process	8.48e-05	0.00302	2.06 (17946,101,2506,29)
GO:0031638	zymogen activation	8.48e-05	0.00301	2.06 (17946,101,2506,29)
GO:0006749	glutathione metabolic process	8.52e-05	0.00302	2.65 (17946,46,2506,17)
GO:0046330	positive regulation of JNK cascade	8.63e-05	0.00305	2.03 (17946,106,2506,30)
GO:0033674	positive regulation of kinase activity	8.83e-05	0.00311	1.45 (17946,480,2506,97)
GO:2000147	positive regulation of cell motility	9.04e-05	0.00317	1.58 (17946,294,2506,65)
GO:0032319	regulation of Rho GTPase activity	9.07e-05	0.00317	1.78 (17946,173,2506,43)
GO:0006691	leukotriene metabolic process	9.16e-05	0.0032	2.95 (17946,34,2506,14)
GO:0002691	regulation of cellular extravasation	9.54e-05	0.00332	4.41 (17946,13,2506,8)
GO:0015879	carnitine transport	9.54e-05	0.00331	4.41 (17946,13,2506,8)
GO:0015838	amino-acid betaine transport	9.54e-05	0.0033	4.41 (17946,13,2506,8)
GO:0032386	regulation of intracellular transport	0.0001	0.00347	1.49 (17946,393,2506,82)
GO:0030258	lipid modification	0.000101	0.00348	1.90 (17946,132,2506,35)
GO:0072330	monocarboxylic acid biosynthetic process	0.000102	0.00351	1.81 (17946,158,2506,40)
GO:0006693	prostaglandin metabolic process	0.000103	0.00352	3.42 (17946,23,2506,11)
GO:0006692	prostanoid metabolic process	0.000103	0.00351	3.42 (17946,23,2506,11)
GO:0002686	negative regulation of leukocyte migration	0.000103	0.0035	3.42 (17946,23,2506,11)
GO:0032967	positive regulation of collagen biosynthetic process	0.000103	0.00349	3.42 (17946,23,2506,11)
GO:0070304	positive regulation of stress-activated protein kinase signaling cascade	0.000105	0.00355	1.96 (17946,117,2506,32)
GO:0030098	lymphocyte differentiation	0.000109	0.00369	1.78 (17946,169,2506,42)
GO:0046634	regulation of alpha-beta T cell activation	0.000113	0.0038	2.39 (17946,60,2506,20)
GO:0009628	response to abiotic stimulus	0.000113	0.0038	1.30 (17946,964,2506,175)
GO:0097202	activation of cysteine-type endopeptidase activity	0.000115	0.00387	2.12 (17946,88,2506,26)
GO:0002709	regulation of T cell mediated immunity	0.000116	0.00389	2.59 (17946,47,2506,17)
GO:0030574	collagen catabolic process	0.000121	0.00403	2.23 (17946,74,2506,23)
GO:0008652	cellular amino acid biosynthetic process	0.000122	0.00408	2.05 (17946,98,2506,28)
GO:0010332	response to gamma radiation	0.000125	0.00414	2.66 (17946,43,2506,16)
GO:0071219	cellular response to molecule of bacterial origin	0.000125	0.00415	1.96 (17946,113,2506,31)
GO:0046879	hormone secretion	0.000127	0.00421	2.31 (17946,65,2506,21)
GO:0042886	amide transport	0.000129	0.00426	2.18 (17946,79,2506,24)
GO:0044253	positive regulation of multicellular organismal metabolic process	0.00013	0.00428	3.00 (17946,31,2506,13)
GO:0051179	localization	0.000131	0.00428	1.13 (17946,3737,2506,592)
GO:0030199	collagen fibril organization	0.000131	0.00427	2.75 (17946,39,2506,15)
GO:0016126	sterol biosynthetic process	0.000131	0.00426	2.75 (17946,39,2506,15)
GO:0001818	negative regulation of cytokine production	0.000131	0.00426	1.74 (17946,181,2506,44)
GO:0070482	response to oxygen levels	0.000131	0.00426	1.61 (17946,258,2506,58)
GO:0034121	regulation of toll-like receptor signaling pathway	0.000133	0.00431	2.86 (17946,35,2506,14)
GO:0001932	regulation of protein phosphorylation	0.000138	0.00446	1.30 (17946,955,2506,173)
GO:0002449	lymphocyte mediated immunity	0.000142	0.00457	2.48 (17946,52,2506,18)
GO:0019216	regulation of lipid metabolic process	0.000153	0.00492	1.63 (17946,237,2506,54)
GO:0045088	regulation of innate immune response	0.000157	0.00503	1.61 (17946,254,2506,57)
GO:0031223	auditory behavior	0.00016	0.00512	5.37 (17946,8,2506,6)
GO:0001523	retinoid metabolic process	0.000161	0.00512	2.15 (17946,80,2506,24)
GO:0071260	cellular response to mechanical stimulus	0.000163	0.00517	2.28 (17946,66,2506,21)
GO:0010714	positive regulation of collagen metabolic process	0.000166	0.00526	3.28 (17946,24,2506,11)
GO:0009395	phospholipid catabolic process	0.000166	0.00524	3.28 (17946,24,2506,11)
GO:0043304	regulation of mast cell degranulation	0.000167	0.00528	3.79 (17946,17,2506,9)
GO:0006081	cellular aldehyde metabolic process	0.000171	0.00538	2.60 (17946,44,2506,16)
GO:0050852	T cell receptor signaling pathway	0.000173	0.00544	2.07 (17946,90,2506,26)
GO:0008152	metabolic process	0.000174	0.00544	1.06 (17946,9472,2506,1406)
GO:0009891	positive regulation of biosynthetic process	0.000177	0.00552	1.23 (17946,1500,2506,257)
GO:0006694	steroid biosynthetic process	0.00018	0.0056	1.98 (17946,105,2506,29)
GO:0022604	regulation of cell morphogenesis	0.00018	0.00559	1.48 (17946,382,2506,79)
GO:0009611	response to wounding	0.000182	0.00565	1.77 (17946,162,2506,40)
GO:0009888	tissue development	0.000185	0.00574	1.37 (17946,617,2506,118)
GO:0033628	regulation of cell adhesion mediated by integrin	0.00019	0.00587	2.78 (17946,36,2506,14)
GO:0006801	superoxide metabolic process	0.000192	0.00591	2.91 (17946,32,2506,13)
GO:0043123	positive regulation of I-kappaB kinase/NF-kappaB signaling	0.0002	0.00613	1.75 (17946,168,2506,41)
GO:0006600	creatine metabolic process	0.000202	0.0062	4.56 (17946,11,2506,7)
GO:0006105	succinate metabolic process	0.000202	0.00618	4.56 (17946,11,2506,7)
GO:0006000	fructose metabolic process	0.000202	0.00617	4.56 (17946,11,2506,7)
GO:0003081	regulation of systemic arterial blood pressure by renin-angiotensin	0.000202	0.00615	4.56 (17946,11,2506,7)
GO:0002888	positive regulation of myeloid leukocyte mediated immunity	0.000202	0.00614	4.56 (17946,11,2506,7)
GO:0002768	immune response-regulating cell surface receptor signaling pathway	0.000204	0.00619	1.54 (17946,302,2506,65)
GO:0016101	diterpenoid metabolic process	0.000206	0.00621	2.08 (17946,86,2506,25)
GO:0042327	positive regulation of phosphorylation	0.000207	0.00623	1.32 (17946,786,2506,145)
GO:0055080	cation homeostasis	0.000209	0.0063	1.43 (17946,455,2506,91)
GO:0060627	regulation of vesicle-mediated transport	0.000209	0.00628	1.53 (17946,308,2506,66)
GO:0032874	positive regulation of stress-activated MAPK cascade	0.00021	0.0063	1.91 (17946,116,2506,31)
GO:0051047	positive regulation of secretion	0.000214	0.0064	1.55 (17946,291,2506,63)
GO:0010557	positive regulation of macromolecule biosynthetic process	0.000216	0.00645	1.24 (17946,1368,2506,236)
GO:0048729	tissue morphogenesis	0.000217	0.00647	1.50 (17946,349,2506,73)
GO:0044262	cellular carbohydrate metabolic process	0.000219	0.00651	1.77 (17946,158,2506,39)
GO:0031589	cell-substrate adhesion	0.000223	0.0066	1.83 (17946,137,2506,35)
GO:0055082	cellular chemical homeostasis	0.000226	0.00667	1.44 (17946,444,2506,89)
GO:0045860	positive regulation of protein kinase activity	0.000226	0.00667	1.43 (17946,456,2506,91)
GO:0051234	establishment of localization	0.000234	0.00688	1.14 (17946,3429,2506,544)
GO:0002700	regulation of production of molecular mediator of immune response	0.000234	0.00687	2.14 (17946,77,2506,23)
GO:0010628	positive regulation of gene expression	0.000236	0.00691	1.22 (17946,1546,2506,263)
GO:0008285	negative regulation of cell proliferation	0.000237	0.00693	1.37 (17946,590,2506,113)
GO:0032321	positive regulation of Rho GTPase activity	0.000239	0.00698	1.79 (17946,148,2506,37)
GO:0048812	neuron projection morphogenesis	0.00024	0.00698	1.75 (17946,164,2506,40)
GO:0048545	response to steroid hormone	0.000241	0.00699	1.49 (17946,356,2506,74)
GO:0055067	monovalent inorganic cation homeostasis	0.000244	0.00706	2.10 (17946,82,2506,24)
GO:0051093	negative regulation of developmental process	0.00025	0.00722	1.33 (17946,733,2506,136)
GO:0002009	morphogenesis of an epithelium	0.000255	0.00733	1.55 (17946,287,2506,62)
GO:0042035	regulation of cytokine biosynthetic process	0.000255	0.00733	2.02 (17946,92,2506,26)
GO:0071222	cellular response to lipopolysaccharide	0.000256	0.00734	1.94 (17946,107,2506,29)
GO:0008203	cholesterol metabolic process	0.000256	0.00732	1.94 (17946,107,2506,29)
GO:0050714	positive regulation of protein secretion	0.000256	0.00731	1.94 (17946,107,2506,29)
GO:0051250	negative regulation of lymphocyte activation	0.000257	0.00733	1.97 (17946,102,2506,28)
GO:0050850	positive regulation of calcium-mediated signaling	0.000259	0.00735	3.15 (17946,25,2506,11)
GO:0010952	positive regulation of peptidase activity	0.000259	0.00735	1.82 (17946,138,2506,35)
GO:0050731	positive regulation of peptidyl-tyrosine phosphorylation	0.000259	0.00733	1.82 (17946,138,2506,35)
GO:0019725	cellular homeostasis	0.000265	0.00748	1.38 (17946,561,2506,108)
GO:0010959	regulation of metal ion transport	0.000268	0.00755	1.60 (17946,242,2506,54)
GO:0007568	aging	0.000269	0.00757	1.66 (17946,203,2506,47)
GO:0031663	lipopolysaccharide-mediated signaling pathway	0.000275	0.00771	2.96 (17946,29,2506,12)
GO:0046328	regulation of JNK cascade	0.000276	0.00774	1.78 (17946,149,2506,37)
GO:0002716	negative regulation of natural killer cell mediated immunity	0.000281	0.00784	5.97 (17946,6,2506,5)
GO:0045953	negative regulation of natural killer cell mediated cytotoxicity	0.000281	0.00782	5.97 (17946,6,2506,5)
GO:0070861	regulation of protein exit from endoplasmic reticulum	0.000281	0.00781	5.97 (17946,6,2506,5)
GO:0002687	positive regulation of leukocyte migration	0.000289	0.00802	2.11 (17946,78,2506,23)
GO:0052547	regulation of peptidase activity	0.00029	0.00805	1.48 (17946,364,2506,75)
GO:0033006	regulation of mast cell activation involved in immune response	0.000293	0.0081	3.58 (17946,18,2506,9)
GO:0043408	regulation of MAPK cascade	0.000294	0.0081	1.39 (17946,532,2506,103)
GO:0032963	collagen metabolic process	0.000298	0.00821	2.07 (17946,83,2506,24)
GO:1901616	organic hydroxy compound catabolic process	0.000302	0.00831	2.24 (17946,64,2506,20)
GO:0006887	exocytosis	0.000307	0.00842	1.61 (17946,232,2506,52)
GO:0051222	positive regulation of protein transport	0.000307	0.0084	1.61 (17946,232,2506,52)
GO:0097305	response to alcohol	0.000308	0.0084	1.56 (17946,266,2506,58)
GO:0071216	cellular response to biotic stimulus	0.000323	0.00881	1.83 (17946,129,2506,33)
GO:0030301	cholesterol transport	0.00034	0.00924	2.56 (17946,42,2506,15)
GO:0015918	sterol transport	0.00034	0.00923	2.56 (17946,42,2506,15)
GO:0042108	positive regulation of cytokine biosynthetic process	0.000351	0.00951	2.27 (17946,60,2506,19)
GO:0071902	positive regulation of protein serine/threonine kinase activity	0.000355	0.00959	1.57 (17946,256,2506,56)
GO:0043649	dicarboxylic acid catabolic process	0.000367	0.0099	3.82 (17946,15,2506,8)
GO:0097094	craniofacial suture morphogenesis	0.000367	0.00988	3.82 (17946,15,2506,8)
GO:0010744	positive regulation of macrophage derived foam cell differentiation	0.000367	0.00986	3.82 (17946,15,2506,8)
GO:0006767	water-soluble vitamin metabolic process	0.000368	0.00985	2.01 (17946,89,2506,25)
GO:0030049	muscle filament sliding	0.000369	0.00985	2.64 (17946,38,2506,14)
GO:0033275	actin-myosin filament sliding	0.000369	0.00983	2.64 (17946,38,2506,14)
GO:0030030	cell projection organization	0.000369	0.00981	1.36 (17946,572,2506,109)
GO:0051345	positive regulation of hydrolase activity	0.000377	0.01	1.30 (17946,809,2506,147)
GO:1902339	positive regulation of apoptotic process involved in morphogenesis	0.000379	0.0101	7.16 (17946,4,2506,4)
GO:1901523	icosanoid catabolic process	0.000379	0.01	7.16 (17946,4,2506,4)
GO:1901569	fatty acid derivative catabolic process	0.000379	0.01	7.16 (17946,4,2506,4)
GO:0036101	leukotriene B4 catabolic process	0.000379	0.01	7.16 (17946,4,2506,4)
GO:0036100	leukotriene catabolic process	0.000379	0.00998	7.16 (17946,4,2506,4)
GO:0036102	leukotriene B4 metabolic process	0.000379	0.00996	7.16 (17946,4,2506,4)
GO:1903521	positive regulation of mammary gland involution	0.000379	0.00994	7.16 (17946,4,2506,4)
GO:1903519	regulation of mammary gland involution	0.000379	0.00992	7.16 (17946,4,2506,4)
GO:0060058	positive regulation of apoptotic process involved in mammary gland involution	0.000379	0.00989	7.16 (17946,4,2506,4)
GO:0051607	defense response to virus	0.000384	0.00998	1.77 (17946,146,2506,36)
GO:0043270	positive regulation of ion transport	0.000389	0.0101	1.67 (17946,184,2506,43)
GO:0010243	response to organonitrogen compound	0.000389	0.0101	1.33 (17946,678,2506,126)
GO:0030073	insulin secretion	0.00039	0.0101	2.74 (17946,34,2506,13)
GO:0042743	hydrogen peroxide metabolic process	0.00039	0.0101	2.74 (17946,34,2506,13)
GO:0001914	regulation of T cell mediated cytotoxicity	0.000392	0.0101	3.03 (17946,26,2506,11)
GO:1901685	glutathione derivative metabolic process	0.000392	0.0101	3.03 (17946,26,2506,11)
GO:1901687	glutathione derivative biosynthetic process	0.000392	0.0101	3.03 (17946,26,2506,11)
GO:0035987	endodermal cell differentiation	0.000392	0.01	3.03 (17946,26,2506,11)
GO:0051347	positive regulation of transferase activity	0.000394	0.0101	1.36 (17946,573,2506,109)
GO:0005975	carbohydrate metabolic process	0.000396	0.0101	1.31 (17946,747,2506,137)
GO:2000021	regulation of ion homeostasis	0.000399	0.0102	1.73 (17946,157,2506,38)
GO:0006958	complement activation, classical pathway	0.0004	0.0102	2.86 (17946,30,2506,12)
GO:0009636	response to toxic substance	0.000401	0.0102	1.78 (17946,141,2506,35)
GO:0048562	embryonic organ morphogenesis	0.000402	0.0102	1.85 (17946,120,2506,31)
GO:0015833	peptide transport	0.000403	0.0102	2.15 (17946,70,2506,21)
GO:0009914	hormone transport	0.000403	0.0102	2.15 (17946,70,2506,21)
GO:0070252	actin-mediated cell contraction	0.000408	0.0103	2.44 (17946,47,2506,16)
GO:0051493	regulation of cytoskeleton organization	0.000421	0.0106	1.48 (17946,333,2506,69)
GO:0002480	antigen processing and presentation of exogenous peptide antigen via MHC class I, TAP-independent	0.000424	0.0106	4.77 (17946,9,2506,6)
GO:0002634	regulation of germinal center formation	0.000424	0.0106	4.77 (17946,9,2506,6)
GO:0019885	antigen processing and presentation of endogenous peptide antigen via MHC class I	0.000424	0.0106	4.77 (17946,9,2506,6)
GO:0043280	positive regulation of cysteine-type endopeptidase activity involved in apoptotic process	0.000424	0.0106	1.89 (17946,110,2506,29)
GO:0002003	angiotensin maturation	0.000426	0.0106	4.18 (17946,12,2506,7)
GO:0043302	positive regulation of leukocyte degranulation	0.000426	0.0106	4.18 (17946,12,2506,7)
GO:1902603	carnitine transmembrane transport	0.000426	0.0106	4.18 (17946,12,2506,7)
GO:0033005	positive regulation of mast cell activation	0.000426	0.0105	4.18 (17946,12,2506,7)
GO:0002698	negative regulation of immune effector process	0.000432	0.0107	2.06 (17946,80,2506,23)
GO:0050729	positive regulation of inflammatory response	0.00044	0.0108	2.02 (17946,85,2506,24)
GO:0030888	regulation of B cell proliferation	0.000467	0.0115	2.34 (17946,52,2506,17)
GO:0050764	regulation of phagocytosis	0.000467	0.0115	2.34 (17946,52,2506,17)
GO:0006091	generation of precursor metabolites and energy	0.000473	0.0116	1.46 (17946,352,2506,72)
GO:0033273	response to vitamin	0.000475	0.0116	2.17 (17946,66,2506,20)
GO:0016310	phosphorylation	0.000475	0.0116	1.27 (17946,953,2506,169)
GO:0010035	response to inorganic substance	0.000482	0.0117	1.45 (17946,370,2506,75)
GO:0036293	response to decreased oxygen levels	0.000488	0.0119	1.57 (17946,242,2506,53)
GO:0032496	response to lipopolysaccharide	0.000489	0.0119	1.59 (17946,225,2506,50)
GO:1903532	positive regulation of secretion by cell	0.000494	0.012	1.54 (17946,265,2506,57)
GO:0002821	positive regulation of adaptive immune response	0.000498	0.012	2.12 (17946,71,2506,21)
GO:0043269	regulation of ion transport	0.000503	0.0121	1.38 (17946,497,2506,96)
GO:0009308	amine metabolic process	0.000505	0.0122	1.79 (17946,132,2506,33)
GO:0048520	positive regulation of behavior	0.000511	0.0123	1.89 (17946,106,2506,28)
GO:0045859	regulation of protein kinase activity	0.000526	0.0126	1.32 (17946,683,2506,126)
GO:0010950	positive regulation of endopeptidase activity	0.000526	0.0126	1.80 (17946,127,2506,32)
GO:0030595	leukocyte chemotaxis	0.000527	0.0126	1.94 (17946,96,2506,26)
GO:0050921	positive regulation of chemotaxis	0.000531	0.0127	1.97 (17946,91,2506,25)
GO:0002886	regulation of myeloid leukocyte mediated immunity	0.000555	0.0132	3.11 (17946,23,2506,10)
GO:0009743	response to carbohydrate	0.000557	0.0132	1.76 (17946,138,2506,34)
GO:0030048	actin filament-based movement	0.000558	0.0132	2.19 (17946,62,2506,19)
GO:0045582	positive regulation of T cell differentiation	0.000558	0.0132	2.19 (17946,62,2506,19)
GO:0034284	response to monosaccharide	0.000566	0.0134	1.84 (17946,117,2506,30)
GO:2000351	regulation of endothelial cell apoptotic process	0.000571	0.0135	2.77 (17946,31,2506,12)
GO:0019674	NAD metabolic process	0.000579	0.0136	2.92 (17946,27,2506,11)
GO:0001666	response to hypoxia	0.000582	0.0137	1.56 (17946,238,2506,52)
GO:0003008	system process	0.000598	0.014	1.24 (17946,1112,2506,193)
GO:0043405	regulation of MAP kinase activity	0.000601	0.0141	1.53 (17946,267,2506,57)
GO:0032655	regulation of interleukin-12 production	0.000603	0.0141	2.44 (17946,44,2506,15)
GO:0003333	amino acid transmembrane transport	0.000603	0.0141	2.44 (17946,44,2506,15)
GO:0007588	excretion	0.000603	0.014	2.44 (17946,44,2506,15)
GO:0098742	cell-cell adhesion via plasma-membrane adhesion molecules	0.000627	0.0146	1.64 (17946,188,2506,43)
GO:0043271	negative regulation of ion transport	0.000634	0.0147	1.95 (17946,92,2506,25)
GO:0032880	regulation of protein localization	0.000635	0.0147	1.36 (17946,531,2506,101)
GO:0050818	regulation of coagulation	0.000635	0.0147	2.01 (17946,82,2506,23)
GO:0002250	adaptive immune response	0.000637	0.0147	1.98 (17946,87,2506,24)
GO:0098542	defense response to other organism	0.000638	0.0147	1.47 (17946,326,2506,67)
GO:0009056	catabolic process	0.000641	0.0147	1.17 (17946,2069,2506,338)
GO:0002237	response to molecule of bacterial origin	0.000645	0.0148	1.56 (17946,239,2506,52)
GO:0002577	regulation of antigen processing and presentation	0.000645	0.0148	3.58 (17946,16,2506,8)
GO:0002902	regulation of B cell apoptotic process	0.000645	0.0148	3.58 (17946,16,2506,8)
GO:0010563	negative regulation of phosphorus metabolic process	0.000653	0.0149	1.39 (17946,452,2506,88)
GO:0045936	negative regulation of phosphate metabolic process	0.000653	0.0149	1.39 (17946,452,2506,88)
GO:0070664	negative regulation of leukocyte proliferation	0.000653	0.0149	2.22 (17946,58,2506,18)
GO:2001056	positive regulation of cysteine-type endopeptidase activity	0.00066	0.015	1.82 (17946,118,2506,30)
GO:0032409	regulation of transporter activity	0.000661	0.015	1.72 (17946,150,2506,36)
GO:0050866	negative regulation of cell activation	0.000672	0.0152	1.76 (17946,134,2506,33)
GO:0070302	regulation of stress-activated protein kinase signaling cascade	0.000674	0.0152	1.67 (17946,172,2506,40)
GO:0043549	regulation of kinase activity	0.000677	0.0153	1.30 (17946,725,2506,132)
GO:0044087	regulation of cellular component biogenesis	0.00068	0.0153	1.38 (17946,483,2506,93)
GO:0045089	positive regulation of innate immune response	0.000705	0.0158	1.63 (17946,189,2506,43)
GO:0098609	cell-cell adhesion	0.000705	0.0158	1.63 (17946,189,2506,43)
GO:0031328	positive regulation of cellular biosynthetic process	0.000718	0.0161	1.20 (17946,1475,2506,248)
GO:0002708	positive regulation of lymphocyte mediated immunity	0.000727	0.0163	2.11 (17946,68,2506,20)
GO:0002824	positive regulation of adaptive immune response based on somatic recombination of immune receptors built from immunoglobulin superfamily domains	0.000727	0.0162	2.11 (17946,68,2506,20)
GO:0007166	cell surface receptor signaling pathway	0.000738	0.0164	1.14 (17946,2720,2506,434)
GO:0019218	regulation of steroid metabolic process	0.000748	0.0166	2.06 (17946,73,2506,21)
GO:0072659	protein localization to plasma membrane	0.00076	0.0169	2.02 (17946,78,2506,22)
GO:0002695	negative regulation of leukocyte activation	0.000766	0.017	1.81 (17946,119,2506,30)
GO:0052548	regulation of endopeptidase activity	0.00077	0.0171	1.45 (17946,346,2506,70)
GO:0045577	regulation of B cell differentiation	0.000777	0.0172	3.22 (17946,20,2506,9)
GO:0045453	bone resorption	0.000777	0.0171	3.22 (17946,20,2506,9)
GO:0015701	bicarbonate transport	0.000798	0.0176	2.69 (17946,32,2506,12)
GO:0043627	response to estrogen	0.000808	0.0178	1.69 (17946,157,2506,37)
GO:0030100	regulation of endocytosis	0.000808	0.0177	1.69 (17946,157,2506,37)
GO:0006957	complement activation, alternative pathway	0.000812	0.0178	3.86 (17946,13,2506,7)
GO:0050857	positive regulation of antigen receptor-mediated signaling pathway	0.000812	0.0178	3.86 (17946,13,2506,7)
GO:0090179	planar cell polarity pathway involved in neural tube closure	0.000812	0.0177	3.86 (17946,13,2506,7)
GO:0050678	regulation of epithelial cell proliferation	0.000828	0.018	1.53 (17946,253,2506,54)
GO:0043300	regulation of leukocyte degranulation	0.000833	0.0181	2.98 (17946,24,2506,10)
GO:0000038	very long-chain fatty acid metabolic process	0.000833	0.0181	2.98 (17946,24,2506,10)
GO:0006979	response to oxidative stress	0.000849	0.0184	1.49 (17946,294,2506,61)
GO:0006837	serotonin transport	0.000868	0.0188	5.12 (17946,7,2506,5)
GO:0002583	regulation of antigen processing and presentation of peptide antigen	0.000868	0.0188	5.12 (17946,7,2506,5)
GO:0042758	long-chain fatty acid catabolic process	0.000868	0.0187	5.12 (17946,7,2506,5)
GO:0043066	negative regulation of apoptotic process	0.00088	0.019	1.29 (17946,774,2506,139)
GO:0055085	transmembrane transport	0.000912	0.0196	1.24 (17946,1076,2506,186)
GO:0050688	regulation of defense response to virus	0.000916	0.0197	1.99 (17946,79,2506,22)
GO:0042590	antigen processing and presentation of exogenous peptide antigen via MHC class I	0.000916	0.0196	1.99 (17946,79,2506,22)
GO:0032102	negative regulation of response to external stimulus	0.000925	0.0198	1.57 (17946,214,2506,47)
GO:0009109	coenzyme catabolic process	0.000933	0.0199	4.30 (17946,10,2506,6)
GO:0060363	cranial suture morphogenesis	0.000933	0.0199	4.30 (17946,10,2506,6)
GO:0002831	regulation of response to biotic stimulus	0.000961	0.0205	1.82 (17946,110,2506,28)
GO:0071900	regulation of protein serine/threonine kinase activity	0.000973	0.0207	1.40 (17946,409,2506,80)
GO:0051129	negative regulation of cellular component organization	0.000982	0.0208	1.37 (17946,470,2506,90)
GO:0036294	cellular response to decreased oxygen levels	0.000995	0.0211	1.84 (17946,105,2506,27)
GO:0032270	positive regulation of cellular protein metabolic process	0.000995	0.021	1.24 (17946,1065,2506,184)
